# Supplementary material for: The relationship between cell adhesion force activation on nano/micro-topographical surfaces and temporal dependence of cell morphology
Source: Royal Society of Chemistry journal article supplement (doi:10.1039/c7nr04785a), 2017-01-01
Supplement: c7nr04785a1.pdf [file c7nr04785a1.pdf]

## **Supplementary information**

### **The relationship between cell adhesion force activation on nano/micro-topographical surfaces and temporal dependence of cell morphology**

Tamaki Naganuma\*

*\* Research Centre for Functional Materials, National Institute for Materials Science  
1-1 Namiki, Tsukuba, Ibaraki, 305-0044, Japan.*

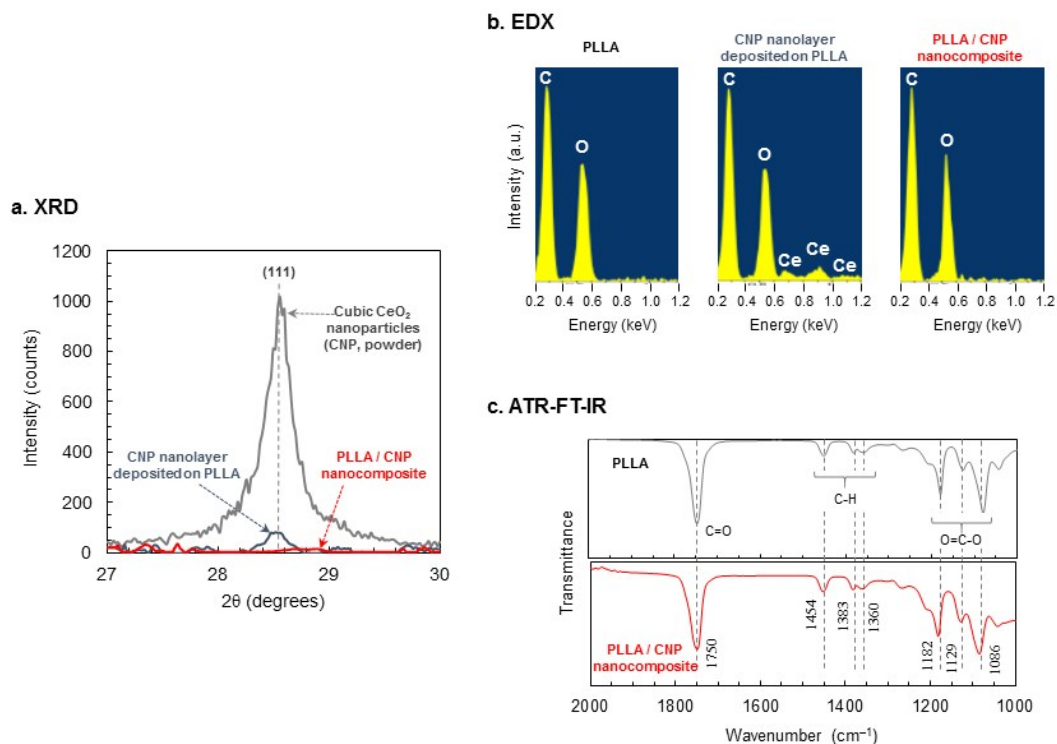

Fig. S1 The physical and chemical characteristics of a cerium oxide nanoparticle-dispersed PLLA matrix nanocomposite surface: (a) X-ray diffraction spectra of cerium oxide nanoparticles (CNP), CNP nanolayer deposited on PLLA substrate<sup>1-3</sup> and PLLA/CNP nanocomposite, measured by X-ray diffraction analysis (RINT 2500, Rigaku Corporation, JAPAN); (b) element spectra of PLLA matrix, CNP nanolayer deposited on PLLA substrate<sup>1-3</sup> and PLLA/CNP nanocomposite, detected by Field Emission Scanning Electron Microscopes (FE-SEM, S-4800, Hitachi High-Technologies Corporation, JAPAN) combined with Energy Dispersive X-ray spectrometry (EDX, E-MAX Evolution, Horiba Ltd., JAPAN); and (c) chemical bond spectra of PLLA matrix and PLLA/CNP nanocomposite, detected by Attenuated Total Reflection–Fourier Transform Infrared spectrometer (ATR-FTIR, Nicolet 4700, Thermo Fisher Scientific K.K. JAPAN). This data confirms that the top surface of PLLA/CNP nanocomposite can be used as a nano-rough PLLA surface.

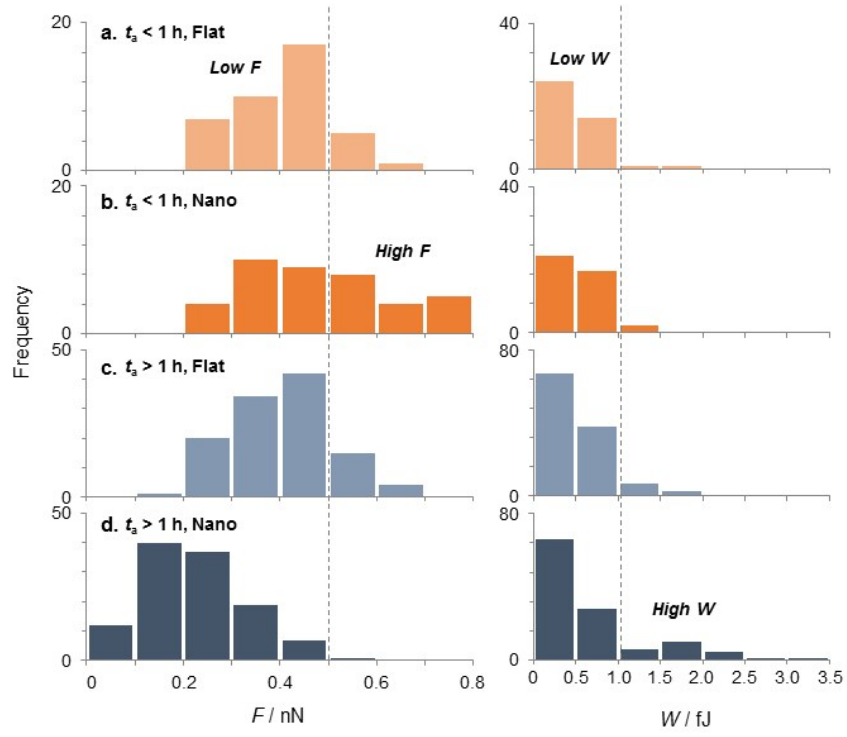

Fig. S2 Histogram of cell detachment force and work on flat and nano-topographical surfaces at cell adhesion time after initial attachment on the cantilever,  $t_a < 1$  h and  $t_a > 1$  h.

Table S1 Detailed measurement conditions of cell detachment force properties on substrates in each figure.

|          |            | Measured cell detachment force(F) and/or work (W) on $\alpha$ | Time periods         | $t_s$ on $\beta$ | $\beta$       | Functionalization on cantilever | $t_d$ *     | Force activation on topography | Fig.   |
|----------|------------|---------------------------------------------------------------|----------------------|------------------|---------------|---------------------------------|-------------|--------------------------------|--------|
| $\alpha$ |            |                                                               |                      |                  |               |                                 |             |                                |        |
| Scope 1  | Nano-rough | Nano / Flat                                                   | Initial              | < 1 h            | TL-cantilever | Con A                           | 1 s         | ○                              | 5c     |
|          |            | Nano / Flat                                                   | Intermediate         | > 1 h            | TL-cantilever | Con A                           | 1 s         | ×                              | 5d     |
|          | Micro-Dot  | Dot 5                                                         | Initial              | < 1 h            | TL-cantilever | Con A                           | 1 s         | ×                              | 6b     |
|          |            | Dot 5                                                         | Initial/Intermediate | ~ 1 h            | TL-cantilever | Con A                           | 10 s        | × / ○                          | 6c     |
|          |            | Dot 40 / Flat                                                 | Intermediate         | > 1 h            | TL-cantilever | Con A                           | 10 s        | ○                              | 6d, 6e |
|          | Micro-Line | Line 5                                                        | Initial              | < 1 h            | TL-cantilever | Con A                           | 1 s         | ○                              | 7a     |
|          |            | Line 5 / Flat                                                 | Initial              | < 1 h            | TL-cantilever | Con A                           | 10 s        | ○                              | 7a     |
|          |            | Line 5 / Line 40                                              | Intermediate         | > 1 h            | TL-cantilever | Con A                           | 10 s        | ○                              | 7b, 7c |
|          | Scope 2    | Micro-Line                                                    | Line 5               | Initial          | > 1 h         | TL-cantilever                   | Con A       | 10 s                           | ○      |
| Line 5   |            |                                                               | Intermediate         | 2 ~ 12 h         | TL-cantilever | Con A                           | 10 and 60 s | ○                              | 8      |
| Line 5   |            |                                                               | Long-term***         | > 24 h           | Line 5        | FN                              | 180 s**     | ○                              | 9      |

\* Duration time of a cell (immobilized on TL-cantilever) on  $\alpha$ -substrate

\*\* Duration time of a cantilever (NSC12, type C) on cell surface, necessary to capture a cell from  $\alpha$ -substrate

\*\*\* To evaluate cell adhesion force in long-term periods, a cell-capture method, in which a cantilever directly captures a cell attached on  $\alpha$ -substrate, is used.

## Reference

1. T. Naganuma and E. Traversa, *Biomaterials*, 2012, **4**, 4950-4953.
2. T. Naganuma and E. Traversa, *Biomaterials*, 2014, **35**, 4441-4453.
3. T. Naganuma and E. Traversa, *Nanoscale*, 2014, **6**, 6637-6645.
